# Supplementary material
Source: publisher figshare collection journal article supplement (https://karger.figshare.com/ndownloader/files/13236647)
Supplement: Supplementary file 1 [file 13236647]

Table S1 The comparison between the medically and surgically treated patients

|  | **All patients**  **n=529** | **No AVR n=216** | **AVR n=313** | **t-test** |
| --- | --- | --- | --- | --- |
| **Variable** | **Mean (sd)** | | | **p-value** |
| Age (yrs) | 78.57(10) | 82.84(9.1) | 75.6(9.6) | <.0001 |
| Males (%) | 0.48(0.5) | 0.43(0.5) | 0.51(0.5) | 0.0565 |
| BSA (m2) | 1.82(0.3) | 1.77(0.3) | 1.85(0.2) | <.0001 |
| Systolic blood pressure (mmHg) | 134.64(23.1) | 134.65(24.1) | 134.64(22.4) | 0.9967 |
| Diastolic blood pressure (mmHg) | 66.06(13.3) | 63.89(14.2) | 67.51(12.5) | 0.0055 |
| Heart rate (b/min) | 70.3(12.7) | 72.21(13.8) | 68.96(11.7) | 0.0049 |
| LVEDV index (ml/m2) | 41.5(12.8) | 38.96(12.1) | 43.24(12.9) | 0.0002 |
| LVESV index (ml/m2) | 14.88(6.7) | 13.79(5.7) | 15.62(7.2) | 0.0017 |
| LVOT diameter (mm) | 19.25(2) | 18.74(1.9) | 19.6(2) | <.0001 |
| Biplane EF (%) | 64.97(8) | 64.8(7.8) | 65.1(8.1) | 0.6743 |
| LV mass index (g/m2) | 119.81(32.4) | 117.98(32.2) | 121.07(32.6) | 0.2826 |
| Relative wall thickness | 60.41(13.5) | 61.38(14.5) | 59.73(12.7) | 0.1769 |
| LV mass index/EDV index | 3.13(1.2) | 3.28(1.3) | 3.02(1.2) | 0.0206 |
| Stroke volume index (ml/m2) | 36.39(8.4) | 34.84(8.3) | 37.46(8.4) | 0.0004 |
| Flow rate (ml/sec) | 213.9(51.9) | 201.38(54.8) | 222.61(48) | <.0001 |
| AV ejection period (ms) | 309(32.1) | 306.68(32.6) | 310.61(31.7) | 0.1668 |
| AV peak velocity (cm/sec) | 417.8(78.4) | 403.39(87) | 427.82(70.3) | 0.0007 |
| AV peak gradient (mmHg) | 72.13(27) | 68.11(29.3) | 74.92(24.9) | 0.0055 |
| AV mean gradient (mmHg) | 44.32(17.5) | 41.75(19.1) | 46.11(16.1) | 0.0063 |
| AVAi (cm/m2) | 0. 38(0.09) | 0.39(0.10) | 0.37(0.08) | 0.1445 |
| Energy loss index (cm/m2) | 0.42(0.1) | 0.43(0.1) | 0.41(0.1) | 0.0600 |
| Velocity ratio | 0.24(0.1) | 0.25(0.1) | 0.23(0.1) | 0.0023 |
| E/E’avg (cm/sec) | 14.25(5.9) | 13.71(4.8) | 14.56(6.5) | 0.18 |
| Systemic arterial compliance (ml.mmHg-1.m-2) | 0.58(0.2) | 0.53(0.2) | 0.62(0.2) | <.0001 |
| Systemic vascular resistance (dyne.s.cm-5) | 1664.9(494.1) | 1723.04(567.9) | 1626.15(434.9) | 0.0573 |
| Global afterload (mmHg.ml-1.m-2) | 5.16(1.4) | 5.32(1.4) | 5.06(1.3) | 0.0534 |
